# Supplementary material for: Evaluation of the Utility of Capsular Stabilization Devices in a Zonular Fiber Defect Model with the Slit Side View System
Source: J Ophthalmol. 2020 Aug 8;2020:5921965. doi: 10.1155/2020/5921965 (PMC7429767; doi:10.1155/2020/5921965)
Supplement: Supplementary Materials — Video legends: video S1: in the control group, phacoemulsification was performed without any support. The equator of the lens was unstable and was easily suctioned into the port of the US hand piece. Video S2: in the CE group, phacoemulsification was performed with one CE. Although the CE supported the lens capsule through the corneal side port during phacoemulsification, the position of the capsular bag was shifted upward. Video S3: in the CTR group, phacoemulsification was performed with a CTR. SSV demonstrated that the CTR stretched the lens capsule and supported the remaining Zinn's zonules in the original position. [file 5921965.f1.zip]

Archive with 3 entries (3 files):
- 5921965.f1/kunishige. Video File 1 .mp4
- 5921965.f1/kunishige. Video File 2 .mp4
- 5921965.f1/kunishige. Video File 3 .mp4
